# Supplementary material
Source: publisher figshare collection journal article supplement (https://acs.figshare.com/ndownloader/files/3879631)
Supplement: Supplementary file 1 [file 3879631]

data_713-3
_audit_creation_date              2014-09-15
_audit_creation_method
;
Olex2 1.2
(compiled 2014.08.28 svn.r2986 for OlexSys, GUI svn.r4874)
;
_publ_contact_author_address      ?
_publ_contact_author_email        ?
_publ_contact_author_name         ''
_publ_contact_author_phone        ?
_publ_section_references
;
Dolomanov, O.V., Bourhis, L.J., Gildea, R.J, Howard, J.A.K. & Puschmann, H.
 (2009), J. Appl. Cryst. 42, 339-341.

Sheldrick, G.M. (2008). Acta Cryst. A64, 112-122.
;
_chemical_name_common             ?
_chemical_name_systematic
;
 ? 
;
_chemical_formula_moiety          '0.06(C1536 H1776 B48 O224 Zn48)'
_chemical_formula_sum             'C96 H111 B3 O14 Zn3'
_chemical_formula_weight          1717.39
_chemical_melting_point           ?
_chemical_oxdiff_formula          'C H OB Zn'
loop_
  _atom_type_symbol
  _atom_type_description
  _atom_type_scat_dispersion_real
  _atom_type_scat_dispersion_imag
  _atom_type_scat_source
 'C' 'C' 0.0181 0.0091 'International Tables Vol C Tables 4.2.6.8 and 6.1.1.4'
 'H' 'H' 0.0000 0.0000 'International Tables Vol C Tables 4.2.6.8 and 6.1.1.4'
 'B' 'B' 0.0090 0.0039 'International Tables Vol C Tables 4.2.6.8 and 6.1.1.4'
 'O' 'O' 0.0492 0.0322 'International Tables Vol C Tables 4.2.6.8 and 6.1.1.4'
 'Zn' 'Zn' -1.5491 0.6778
 'International Tables Vol C Tables 4.2.6.8 and 6.1.1.4'

_space_group_crystal_system       'cubic'
_space_group_IT_number            230
_space_group_name_H-M_alt         'I a -3 d'
_space_group_name_Hall            '-I 4bd 2c 3'
loop_
  _space_group_symop_id
  _space_group_symop_operation_xyz
 1 'x, y, z'
 2 '-y+1/4, x+3/4, z+1/4'
 3 'x, -y, -z+1/2'
 4 'z, x, y'
 5 '-x+1/2, -y, z+1/2'
 6 '-y+1/4, -x+1/4, -z+1/4'
 7 'y+1/4, x+3/4, -z+3/4'
 8 'z+1/4, -y+1/4, x+3/4'
 9 '-x+1/4, z+3/4, y+1/4'
 10 '-z+1/2, x, -y'
 11 'z, -x, -y+1/2'
 12 'y, z, x'
 13 'y+1/4, -x+1/4, z+3/4'
 14 '-x+1/2, y, -z'
 15 '-z+1/2, -x, y+1/2'
 16 '-z+1/4, -y+1/4, -x+1/4'
 17 '-x+1/4, -z+1/4, -y+1/4'
 18 'z+1/4, y+3/4, -x+3/4'
 19 'x+1/4, z+3/4, -y+3/4'
 20 '-z+1/4, y+3/4, x+1/4'
 21 '-y, -z+1/2, x'
 22 'y, -z, -x+1/2'
 23 '-y+1/2, z, -x'
 24 'x+1/4, -z+1/4, y+3/4'
 25 'x+1/2, y+1/2, z+1/2'
 26 '-y+3/4, x+5/4, z+3/4'
 27 'x+1/2, -y+1/2, -z+1'
 28 'z+1/2, x+1/2, y+1/2'
 29 '-x+1, -y+1/2, z+1'
 30 '-y+3/4, -x+3/4, -z+3/4'
 31 'y+3/4, x+5/4, -z+5/4'
 32 'z+3/4, -y+3/4, x+5/4'
 33 '-x+3/4, z+5/4, y+3/4'
 34 '-z+1, x+1/2, -y+1/2'
 35 'z+1/2, -x+1/2, -y+1'
 36 'y+1/2, z+1/2, x+1/2'
 37 'y+3/4, -x+3/4, z+5/4'
 38 '-x+1, y+1/2, -z+1/2'
 39 '-z+1, -x+1/2, y+1'
 40 '-z+3/4, -y+3/4, -x+3/4'
 41 '-x+3/4, -z+3/4, -y+3/4'
 42 'z+3/4, y+5/4, -x+5/4'
 43 'x+3/4, z+5/4, -y+5/4'
 44 '-z+3/4, y+5/4, x+3/4'
 45 '-y+1/2, -z+1, x+1/2'
 46 'y+1/2, -z+1/2, -x+1'
 47 '-y+1, z+1/2, -x+1/2'
 48 'x+3/4, -z+3/4, y+5/4'
 49 '-x, -y, -z'
 50 'y-1/4, -x-3/4, -z-1/4'
 51 '-x, y, z-1/2'
 52 '-z, -x, -y'
 53 'x-1/2, y, -z-1/2'
 54 'y-1/4, x-1/4, z-1/4'
 55 '-y-1/4, -x-3/4, z-3/4'
 56 '-z-1/4, y-1/4, -x-3/4'
 57 'x-1/4, -z-3/4, -y-1/4'
 58 'z-1/2, -x, y'
 59 '-z, x, y-1/2'
 60 '-y, -z, -x'
 61 '-y-1/4, x-1/4, -z-3/4'
 62 'x-1/2, -y, z'
 63 'z-1/2, x, -y-1/2'
 64 'z-1/4, y-1/4, x-1/4'
 65 'x-1/4, z-1/4, y-1/4'
 66 '-z-1/4, -y-3/4, x-3/4'
 67 '-x-1/4, -z-3/4, y-3/4'
 68 'z-1/4, -y-3/4, -x-1/4'
 69 'y, z-1/2, -x'
 70 '-y, z, x-1/2'
 71 'y-1/2, -z, x'
 72 '-x-1/4, z-1/4, -y-3/4'
 73 '-x+1/2, -y+1/2, -z+1/2'
 74 'y+1/4, -x-1/4, -z+1/4'
 75 '-x+1/2, y+1/2, z'
 76 '-z+1/2, -x+1/2, -y+1/2'
 77 'x, y+1/2, -z'
 78 'y+1/4, x+1/4, z+1/4'
 79 '-y+1/4, -x-1/4, z-1/4'
 80 '-z+1/4, y+1/4, -x-1/4'
 81 'x+1/4, -z-1/4, -y+1/4'
 82 'z, -x+1/2, y+1/2'
 83 '-z+1/2, x+1/2, y'
 84 '-y+1/2, -z+1/2, -x+1/2'
 85 '-y+1/4, x+1/4, -z-1/4'
 86 'x, -y+1/2, z+1/2'
 87 'z, x+1/2, -y'
 88 'z+1/4, y+1/4, x+1/4'
 89 'x+1/4, z+1/4, y+1/4'
 90 '-z+1/4, -y-1/4, x-1/4'
 91 '-x+1/4, -z-1/4, y-1/4'
 92 'z+1/4, -y-1/4, -x+1/4'
 93 'y+1/2, z, -x+1/2'
 94 '-y+1/2, z+1/2, x'
 95 'y, -z+1/2, x+1/2'
 96 '-x+1/4, z+1/4, -y-1/4'

_cell_length_a                    37.0156(11)
_cell_length_b                    37.0156(11)
_cell_length_c                    37.0156(11)
_cell_angle_alpha                 90.00
_cell_angle_beta                  90.00
_cell_angle_gamma                 90.00
_cell_volume                      50717(3)
_cell_formula_units_Z             16
_cell_measurement_reflns_used     ?
_cell_measurement_temperature     150
_cell_measurement_theta_max       ?
_cell_measurement_theta_min       ?
_exptl_absorpt_coefficient_mu     1.008
_exptl_absorpt_correction_T_max   ?
_exptl_absorpt_correction_T_min   ?
_exptl_absorpt_correction_type    ?
_exptl_absorpt_process_details    ?
_exptl_crystal_colour             ''
_exptl_crystal_density_diffrn     0.900
_exptl_crystal_density_meas       ?
_exptl_crystal_density_method     'not measured'
_exptl_crystal_description        ''
_exptl_crystal_F_000              14464
_exptl_crystal_size_max           0.25
_exptl_crystal_size_mid           0.2
_exptl_crystal_size_min           0.17
_exptl_special_details
;
 ? 
;
_diffrn_reflns_av_R_equivalents   0.0623
_diffrn_reflns_av_unetI/netI      0.0696
_diffrn_reflns_limit_h_max        40
_diffrn_reflns_limit_h_min        -32
_diffrn_reflns_limit_k_max        45
_diffrn_reflns_limit_k_min        -30
_diffrn_reflns_limit_l_max        31
_diffrn_reflns_limit_l_min        -42
_diffrn_reflns_number             17102
_diffrn_reflns_theta_full         70.72
_diffrn_reflns_theta_max          70.72
_diffrn_reflns_theta_min          4.47
_diffrn_ambient_temperature       150
_diffrn_detector_area_resol_mean  ?
_diffrn_measured_fraction_theta_full 0.986
_diffrn_measured_fraction_theta_max 0.986
_diffrn_measurement_details
;
#__ type_ start__ end____ width___ exp.time_
  1 omega  -14.00   11.00   1.0000   10.0000
omega____ theta____ kappa____ phi______ frames
    -        0.0000  -86.0000  -97.0000 25

#__ type_ start__ end____ width___ exp.time_
  2 omega   44.00   98.00   1.0000   50.0000
omega____ theta____ kappa____ phi______ frames
    -       54.0000 -125.0000 -180.0000 54

#__ type_ start__ end____ width___ exp.time_
  3 omega   34.00   76.00   1.0000   60.0000
omega____ theta____ kappa____ phi______ frames
    -      108.0000  -25.0000  120.0000 42

#__ type_ start__ end____ width___ exp.time_
  4 omega   87.00  140.00   1.0000   60.0000
omega____ theta____ kappa____ phi______ frames
    -      108.0000   63.0000  120.0000 53
;
_diffrn_measurement_device_type   ?
_diffrn_measurement_method        ?
_diffrn_orient_matrix_UB_11       -0.0055514000
_diffrn_orient_matrix_UB_12       -0.0366236000
_diffrn_orient_matrix_UB_13       -0.0190888000
_diffrn_orient_matrix_UB_21       -0.0213135000
_diffrn_orient_matrix_UB_22       -0.0140192000
_diffrn_orient_matrix_UB_23       0.0328917000
_diffrn_orient_matrix_UB_31       -0.0352663000
_diffrn_orient_matrix_UB_32       0.0142409000
_diffrn_orient_matrix_UB_33       -0.0167613000
_diffrn_radiation_monochromator   ?
_diffrn_radiation_type            CuK\a
_diffrn_radiation_wavelength      1.54184
_diffrn_source                    ?
_diffrn_standards_decay_%         ?
_diffrn_standards_interval_count  ?
_diffrn_standards_interval_time   ?
_diffrn_standards_number          ?
_reflns_number_gt                 1356
_reflns_number_total              4026
_reflns_odcompleteness_completeness 99.65
_reflns_odcompleteness_iscentric  1
_reflns_odcompleteness_theta      66.97
_reflns_threshold_expression      >2sigma(I)
_computing_cell_refinement        ?
_computing_data_collection        ?
_computing_data_reduction         ?
_computing_molecular_graphics     'Olex2 (Dolomanov et al., 2009)'
_computing_publication_material   'Olex2 (Dolomanov et al., 2009)'
_computing_structure_refinement   'XL (Sheldrick, 2008)'
_computing_structure_solution     'SHELXS-97 (Sheldrick, 1990)'
_refine_diff_density_max          0.300
_refine_diff_density_min          -0.460
_refine_diff_density_rms          0.052
_refine_ls_extinction_coef        ?
_refine_ls_extinction_method      none
_refine_ls_goodness_of_fit_ref    1.006
_refine_ls_hydrogen_treatment     mixed
_refine_ls_matrix_type            full
_refine_ls_number_parameters      183
_refine_ls_number_reflns          4026
_refine_ls_number_restraints      2
_refine_ls_R_factor_all           0.1618
_refine_ls_R_factor_gt            0.0862
_refine_ls_restrained_S_all       1.007
_refine_ls_shift/su_max           0.004
_refine_ls_shift/su_mean          0.000
_refine_ls_structure_factor_coef  Fsqd
_refine_ls_weighting_details
'calc w=1/[\s^2^(Fo^2^)+(0.0830P)^2^+0.0000P] where P=(Fo^2^+2Fc^2^)/3'
_refine_ls_weighting_scheme       calc
_refine_ls_wR_factor_gt           0.2178
_refine_ls_wR_factor_ref          0.2478
_refine_special_details
;
 Refinement of F^2^ against ALL reflections.  The weighted R-factor wR and 
 goodness of fit S are based on F^2^, conventional R-factors R are based 
 on F, with F set to zero for negative F^2^. The threshold expression of 
 F^2^ > 2sigma(F^2^) is used only for calculating R-factors(gt) etc. and is 
 not relevant to the choice of reflections for refinement.  R-factors based 
 on F^2^ are statistically about twice as large as those based on F, and R- 
 factors based on ALL data will be even larger. 
;
_olex2_refinement_description
;
1. Others
 Fixed Uiso: H9A(0.255) H9B(0.255) H9C(0.255) H10A(0.215) H10B(0.215)
 H10C(0.215) H8A(0.283) H8B(0.283) H8C(0.283) H11A(0.256) H11B(0.256)
 H11C(0.256) H17A(0.261) H17B(0.261) H17C(0.261) H15(0.475) H16A(0.49)
 H16B(0.49) H16C(0.49)
 Fixed X: Zn1(0.5) H9A(0.4661) H9B(0.4673) H9C(0.4956) H10A(0.3475)
 H10B(0.3602) H10C(0.3369) H8A(0.508) H8B(0.488) H8C(0.4859) H11A(0.3807)
 H11B(0.3724) H11C(0.3486) H17A(0.4609) H17B(0.4358) H17C(0.4209) H15(0.5098)
 H16A(0.4773) H16B(0.5043) H16C(0.5159)
 Fixed Y: Zn1(0.5) H9A(0.3322) H9B(0.3485) H9C(0.3609) H10A(0.4534)
 H10B(0.4311) H10C(0.4126) C12(0.375) H8A(0.396) H8B(0.405) H8C(0.3659)
 H11A(0.4723) H11B(0.4859) H11C(0.4554) H17A(0.4528) H17B(0.4587) H17C(0.4391)
 B1(0.375) C15(0.375) H15(0.375) H16A(0.4587) H16B(0.4558) H16C(0.4424)
 Fixed Z: Zn1(0.5) H9A(0.5968) H9B(0.6359) H9C(0.6069) H10A(0.6166)
 H10B(0.6502) H10C(0.6201) H8A(0.5587) H8B(0.5225) H8C(0.5387) H11A(0.5333)
 H11B(0.5725) H11C(0.5552) H17A(0.6687) H17B(0.7023) H17C(0.6678) H15(0.7598)
 H16A(0.7446) H16B(0.7121) H16C(0.7506)
;
_atom_sites_solution_hydrogens    geom
_atom_sites_solution_primary      direct
_atom_sites_solution_secondary    difmap
loop_
  _atom_site_label
  _atom_site_type_symbol
  _atom_site_fract_x
  _atom_site_fract_y
  _atom_site_fract_z
  _atom_site_U_iso_or_equiv
  _atom_site_adp_type
  _atom_site_occupancy
  _atom_site_symmetry_multiplicity
  _atom_site_calc_flag
  _atom_site_refinement_flags
  _atom_site_disorder_assembly
  _atom_site_disorder_group
 Zn1 Zn 0.5000 0.5000 0.5000 0.1343(9) Uani 1 6 d S . .
 Zn2 Zn 0.44242(4) 0.44242(4) 0.44242(4) 0.1681(9) Uani 1 3 d S . .
 O1 O 0.45304(13) 0.47463(14) 0.51731(12) 0.158(2) Uani 1 1 d . . .
 O2 O 0.42829(19) 0.4277(2) 0.48956(17) 0.187(3) Uani 1 1 d D . .
 O1W O 0.40894(17) 0.40894(17) 0.40894(17) 0.222(4) Uani 1 3 d S . .
 C6 C 0.44525(15) 0.38424(17) 0.59885(17) 0.137(2) Uani 1 1 d . . .
 C4 C 0.39052(15) 0.41914(19) 0.60424(18) 0.137(2) Uani 1 1 d . . .
 C7 C 0.45237(16) 0.40210(18) 0.56625(19) 0.149(3) Uani 1 1 d . . .
 C2 C 0.42963(16) 0.42819(17) 0.55421(18) 0.139(2) Uani 1 1 d . . .
 C9 C 0.47101(16) 0.35354(17) 0.61078(19) 0.170(3) Uani 1 1 d . . .
 H9A H 0.4661 0.3322 0.5968 0.255 Uiso 1 1 calc R . .
 H9B H 0.4673 0.3485 0.6359 0.255 Uiso 1 1 calc R . .
 H9C H 0.4956 0.3609 0.6069 0.255 Uiso 1 1 calc R . .
 C3 C 0.39819(16) 0.43650(18) 0.57231(16) 0.142(2) Uani 1 1 d . . .
 C1 C 0.4371(2) 0.4439(3) 0.5172(3) 0.173(5) Uani 1 1 d D . .
 C5 C 0.41436(16) 0.39326(18) 0.61829(17) 0.133(2) Uani 1 1 d . . .
 C10 C 0.35542(14) 0.43011(16) 0.62474(16) 0.143(2) Uani 1 1 d . . .
 H10A H 0.3475 0.4534 0.6166 0.215 Uiso 1 1 calc R . .
 H10B H 0.3602 0.4311 0.6502 0.215 Uiso 1 1 calc R . .
 H10C H 0.3369 0.4126 0.6201 0.215 Uiso 1 1 calc R . .
 C12 C 0.4366(2) 0.3750 0.6866(2) 0.159(4) Uani 1 2 d S . .
 C8 C 0.48692(17) 0.39122(19) 0.5444(2) 0.189(4) Uani 1 1 d . . .
 H8A H 0.5080 0.3960 0.5587 0.283 Uiso 1 1 calc R . .
 H8B H 0.4880 0.4050 0.5225 0.283 Uiso 1 1 calc R . .
 H8C H 0.4859 0.3659 0.5387 0.283 Uiso 1 1 calc R . .
 C13 C 0.4534(2) 0.4076(2) 0.6978(2) 0.162(3) Uani 1 1 d . . .
 C11 C 0.37255(16) 0.4652(2) 0.55689(18) 0.171(3) Uani 1 1 d . . .
 H11A H 0.3807 0.4723 0.5333 0.256 Uiso 1 1 calc R . .
 H11B H 0.3724 0.4859 0.5725 0.256 Uiso 1 1 calc R . .
 H11C H 0.3486 0.4554 0.5552 0.256 Uiso 1 1 calc R . .
 C14 C 0.4809(3) 0.4053(3) 0.7248(3) 0.214(4) Uani 1 1 d U . .
 C17 C 0.44171(19) 0.44261(19) 0.6828(2) 0.174(3) Uani 1 1 d . . .
 H17A H 0.4609 0.4528 0.6687 0.261 Uiso 1 1 calc R . .
 H17B H 0.4358 0.4587 0.7023 0.261 Uiso 1 1 calc R . .
 H17C H 0.4209 0.4391 0.6678 0.261 Uiso 1 1 calc R . .
 B1 B 0.4066(2) 0.3750 0.6566(2) 0.128(3) Uani 1 2 d S . .
 C15 C 0.4920(5) 0.3750 0.7420(5) 0.396(18) Uani 1 2 d SU . .
 H15 H 0.5098 0.3750 0.7598 0.475 Uiso 1 2 calc SR . .
 C16 C 0.4961(3) 0.4444(3) 0.7339(3) 0.327(8) Uani 1 1 d . . .
 H16A H 0.4773 0.4587 0.7446 0.490 Uiso 1 1 calc R . .
 H16B H 0.5043 0.4558 0.7121 0.490 Uiso 1 1 calc R . .
 H16C H 0.5159 0.4424 0.7506 0.490 Uiso 1 1 calc R . .

loop_
  _atom_site_aniso_label
  _atom_site_aniso_U_11
  _atom_site_aniso_U_22
  _atom_site_aniso_U_33
  _atom_site_aniso_U_23
  _atom_site_aniso_U_13
  _atom_site_aniso_U_12
 Zn1 0.1343(9) 0.1343(9) 0.1343(9) 0.0755(10) 0.0755(10) 0.0755(10)
 Zn2 0.1681(9) 0.1681(9) 0.1681(9) 0.0825(10) 0.0825(10) 0.0825(10)
 O1 0.150(4) 0.154(4) 0.171(4) 0.086(3) 0.096(3) 0.072(3)
 O2 0.179(5) 0.207(6) 0.177(5) 0.099(5) 0.077(5) 0.069(4)
 O1W 0.222(4) 0.222(4) 0.222(4) 0.001(5) 0.001(5) 0.001(5)
 C6 0.093(4) 0.156(5) 0.162(5) 0.073(4) 0.041(4) 0.007(4)
 C4 0.093(4) 0.167(6) 0.150(5) 0.062(5) 0.040(4) -0.009(4)
 C7 0.107(4) 0.157(5) 0.184(6) 0.100(5) 0.062(4) 0.021(4)
 C2 0.106(4) 0.146(5) 0.165(5) 0.093(4) 0.061(4) 0.039(4)
 C9 0.126(5) 0.165(6) 0.218(7) 0.114(6) 0.035(5) 0.000(4)
 C3 0.114(4) 0.180(6) 0.134(5) 0.075(4) 0.053(4) 0.024(4)
 C1 0.129(6) 0.179(9) 0.211(9) 0.129(8) 0.115(7) 0.082(6)
 C5 0.096(4) 0.158(5) 0.146(5) 0.065(4) 0.028(4) -0.030(4)
 C10 0.105(4) 0.177(6) 0.147(5) 0.040(4) 0.060(4) -0.008(4)
 C12 0.157(5) 0.163(9) 0.157(5) 0.071(5) -0.008(7) -0.071(5)
 C8 0.139(5) 0.204(7) 0.224(7) 0.142(6) 0.097(5) 0.062(5)
 C13 0.154(6) 0.156(6) 0.177(7) 0.053(6) 0.004(5) -0.069(5)
 C11 0.124(5) 0.223(7) 0.165(5) 0.079(5) 0.064(4) 0.066(5)
 C14 0.201(9) 0.229(10) 0.212(9) 0.001(8) -0.051(7) -0.120(9)
 C17 0.183(7) 0.140(5) 0.198(7) 0.047(5) 0.020(5) -0.055(5)
 B1 0.120(5) 0.143(8) 0.120(5) 0.037(5) 0.006(6) -0.037(5)
 C15 0.49(3) 0.209(17) 0.49(3) 0.157(18) -0.13(3) -0.157(18)
 C16 0.389(16) 0.355(15) 0.236(10) 0.010(10) -0.065(11) -0.246(14)

_geom_special_details
;
 All esds (except the esd in the dihedral angle between two l.s. planes) 
 are estimated using the full covariance matrix.  The cell esds are taken 
 into account individually in the estimation of esds in distances, angles 
 and torsion angles; correlations between esds in cell parameters are only 
 used when they are defined by crystal symmetry.  An approximate (isotropic) 
 treatment of cell esds is used for estimating esds involving l.s. planes. 
;
loop_
  _geom_bond_atom_site_label_1
  _geom_bond_atom_site_label_2
  _geom_bond_distance
  _geom_bond_site_symmetry_2
  _geom_bond_publ_flag
 Zn1 O1 2.077(5) 60_666 ?
 Zn1 O1 2.077(5) 4 ?
 Zn1 O1 2.077(5) 49_666 ?
 Zn1 O1 2.077(5) . ?
 Zn1 O1 2.077(5) 52_666 ?
 Zn1 O1 2.077(5) 12 ?
 Zn2 O2 1.902(5) 4 ?
 Zn2 O2 1.902(5) . ?
 Zn2 O2 1.902(5) 12 ?
 Zn2 O1W 2.146(11) . ?
 O1 C1 1.281(11) . ?
 O2 C1 1.231(12) . ?
 C6 C7 1.401(7) . ?
 C6 C9 1.548(7) . ?
 C6 C5 1.391(7) . ?
 C4 C3 1.375(7) . ?
 C4 C5 1.403(7) . ?
 C4 C10 1.558(7) . ?
 C7 C2 1.356(7) . ?
 C7 C8 1.566(7) . ?
 C2 C3 1.378(7) . ?
 C2 C1 1.514(9) . ?
 C3 C11 1.536(7) . ?
 C5 B1 1.596(8) . ?
 C12 C13 1.419(8) . ?
 C12 C13 1.419(8) 32_454 ?
 C12 B1 1.572(13) . ?
 C13 C14 1.433(11) . ?
 C13 C17 1.473(8) . ?
 C14 C15 1.353(16) . ?
 C14 C16 1.588(11) . ?
 B1 C5 1.596(8) 32_454 ?
 C15 C14 1.353(16) 32_454 ?

loop_
  _geom_angle_atom_site_label_1
  _geom_angle_atom_site_label_2
  _geom_angle_atom_site_label_3
  _geom_angle
  _geom_angle_site_symmetry_1
  _geom_angle_site_symmetry_3
  _geom_angle_publ_flag
 O1 Zn1 O1 88.9(2) 60_666 4 ?
 O1 Zn1 O1 180.0(3) 49_666 . ?
 O1 Zn1 O1 88.9(2) 60_666 . ?
 O1 Zn1 O1 91.1(2) 4 12 ?
 O1 Zn1 O1 88.9(2) 52_666 12 ?
 O1 Zn1 O1 180.0(3) 4 52_666 ?
 O1 Zn1 O1 91.1(2) 4 . ?
 O1 Zn1 O1 180.000(1) 60_666 12 ?
 O1 Zn1 O1 88.9(2) 4 49_666 ?
 O1 Zn1 O1 88.9(2) 49_666 12 ?
 O1 Zn1 O1 91.1(2) . 12 ?
 O1 Zn1 O1 91.1(2) 60_666 52_666 ?
 O1 Zn1 O1 91.1(2) 60_666 49_666 ?
 O1 Zn1 O1 88.9(2) . 52_666 ?
 O1 Zn1 O1 91.1(2) 49_666 52_666 ?
 O2 Zn2 O2 115.89(19) 4 . ?
 O2 Zn2 O2 115.89(19) 4 12 ?
 O2 Zn2 O2 115.89(18) . 12 ?
 O2 Zn2 O1W 101.9(3) 4 . ?
 O2 Zn2 O1W 101.9(3) . . ?
 O2 Zn2 O1W 101.9(3) 12 . ?
 C1 O1 Zn1 141.8(4) . . ?
 C1 O2 Zn2 123.4(8) . . ?
 C7 C6 C9 118.4(5) . . ?
 C5 C6 C7 119.1(6) . . ?
 C5 C6 C9 122.3(5) . . ?
 C3 C4 C5 120.5(5) . . ?
 C3 C4 C10 118.0(6) . . ?
 C5 C4 C10 121.4(5) . . ?
 C6 C7 C8 118.5(5) . . ?
 C2 C7 C6 120.1(5) . . ?
 C2 C7 C8 121.4(5) . . ?
 C7 C2 C3 121.6(5) . . ?
 C7 C2 C1 117.2(6) . . ?
 C3 C2 C1 120.6(6) . . ?
 C4 C3 C2 119.2(6) . . ?
 C4 C3 C11 121.0(5) . . ?
 C2 C3 C11 119.8(5) . . ?
 O1 C1 C2 115.0(10) . . ?
 O2 C1 O1 123.9(8) . . ?
 O2 C1 C2 121.1(10) . . ?
 C6 C5 C4 119.3(5) . . ?
 C6 C5 B1 120.4(6) . . ?
 C4 C5 B1 120.3(5) . . ?
 C13 C12 C13 118.0(10) . 32_454 ?
 C13 C12 B1 121.0(5) . . ?
 C13 C12 B1 121.0(5) 32_454 . ?
 C12 C13 C14 117.7(8) . . ?
 C12 C13 C17 120.7(8) . . ?
 C14 C13 C17 121.5(8) . . ?
 C13 C14 C16 110.2(10) . . ?
 C15 C14 C13 126.3(14) . . ?
 C15 C14 C16 123.4(12) . . ?
 C5 B1 C5 120.0(8) 32_454 . ?
 C12 B1 C5 120.0(4) . . ?
 C12 B1 C5 120.0(4) . 32_454 ?
 C14 C15 C14 114(2) 32_454 . ?

_olex2_submission_special_instructions 'No special instructions were received'
_platon_squeeze_details
;
;
# SQUEEZE RESULTS (APPEND TO CIF)
# Note: Data are Listed for all Voids in the P1 Unit Cell
# i.e. Centre of Gravity, Solvent Accessible Volume,
# Recovered number of Electrons in the Void and
# Details about the Squeezed Material
loop_
  _platon_squeeze_void_nr
  _platon_squeeze_void_average_x
  _platon_squeeze_void_average_y
  _platon_squeeze_void_average_z
  _platon_squeeze_void_volume
  _platon_squeeze_void_count_electrons
  _platon_squeeze_void_content
 1 0.196 0.019 0.059 21200 3049 ' '
